# Supplementary material for: Predictive Criteria to Study the Pathogenesis of Malaria-Associated ALI/ARDS in Mice
Source: PubMed Central journal article supplement (PMC4167651; doi:10.1155/2014/872464), 2014-09-02

**Supplementary Table S1.** Cut-offs using the ROC curves for Penh, respiratory frequency and parasitemia from 13 experiments measured on the 7<sup>th</sup> days after infection from the survival group. These data were used to classify the sacrifice group.

| Experiments    | ROC CURVES OF SURVIVAL GROUP |                 |                 |                       |                 |                 |                   |                 |                 | Attributes of survival groups after parameters associations |                 |
|----------------|------------------------------|-----------------|-----------------|-----------------------|-----------------|-----------------|-------------------|-----------------|-----------------|-------------------------------------------------------------|-----------------|
|                | Penh                         |                 |                 | Respiratory Frequency |                 |                 | Parasitemia       |                 |                 |                                                             |                 |
|                | Cut-off (>)                  | Sensitivity (%) | Specificity (%) | Cut-off (<=)          | Sensitivity (%) | Specificity (%) | Cut-off (>)       | Sensitivity (%) | Specificity (%) | Sensitivity (%)                                             | Specificity (%) |
| 1              | 1,87                         | 83              | 100             | 252,20                | 67              | 100             | 10,66             | 100             | 50              | 83                                                          | 100             |
| 2              | 3,25                         | 75              | 100             | 345,80                | 75              | 75              | 13,66             | 100             | 75              | 100                                                         | 100             |
| 3              | 3,38                         | 100             | 50              | 268,90                | 100             | 75              | 12,66             | 100             | 75              | 75                                                          | 71              |
| 4              | 3,62                         | 67              | 100             | 250,00                | 100             | 90              | 12,66             | 67              | 40              | 100                                                         | 90              |
| 5              | 2,4                          | 80              | 63              | 259,20                | 80              | 100             | 13,33             | 60              | 75              | 67                                                          | 90              |
| 6              | 1,02                         | 100             | 86              | 195,70                | 100             | 100             | 12,66             | 100             | 100             | 100                                                         | 100             |
| 7              | 1,77                         | 100             | 71              | 325,00                | 67              | 100             | 15,33             | 67              | 86              | 100                                                         | 75              |
| 8              | 2,42                         | 75              | 100             | 312,20                | 100             | 100             | 17,00             | 100             | 100             | 80                                                          | 100             |
| 9              | 2,38                         | 80              | 80              | 276,00                | 80              | 60              | 13,33             | 100             | 100             | 80                                                          | 100             |
| 10             | 3,66                         | 40              | 100             | 306,90                | 80              | 100             | 13,60             | 100             | 75              | 80                                                          | 90              |
| 11             | 3,46                         | 100             | 100             | 243,00                | 100             | 100             | 20,10             | 75              | 100             | 100                                                         | 100             |
| 12             | 2,69                         | 100             | 75              | 254,50                | 80              | 100             | 11,50             | 80              | 75              | 83                                                          | 75              |
| 13             | 2,83                         | 83              | 80              | 290,50                | 100             | 80              | 17,66             | 80              | 80              | 100                                                         | 90              |
| <b>Range</b>   | <b>1.022-3.664</b>           | <b>40-100</b>   | <b>50-100</b>   | <b>195.7-345.8</b>    | <b>67-100</b>   | <b>60-100</b>   | <b>10.66-20.1</b> | <b>60-100</b>   | <b>40-100</b>   | <b>67-100</b>                                               | <b>71-100</b>   |
| <b>Average</b> | <b>2,67</b>                  | <b>83,33</b>    | <b>85,00</b>    | <b>275,38</b>         | <b>86,8</b>     | <b>90,77</b>    | <b>14,17</b>      | <b>86,8</b>     | <b>79,28</b>    | <b>88,31</b>                                                | <b>90,85</b>    |
| <b>SD</b>      | <b>0,80</b>                  | <b>17,55</b>    | <b>16,85</b>    | <b>40,12</b>          | <b>13,47</b>    | <b>13,67</b>    | <b>2,66</b>       | <b>15,75</b>    | <b>18,82</b>    | <b>11,95</b>                                                | <b>10,81</b>    |

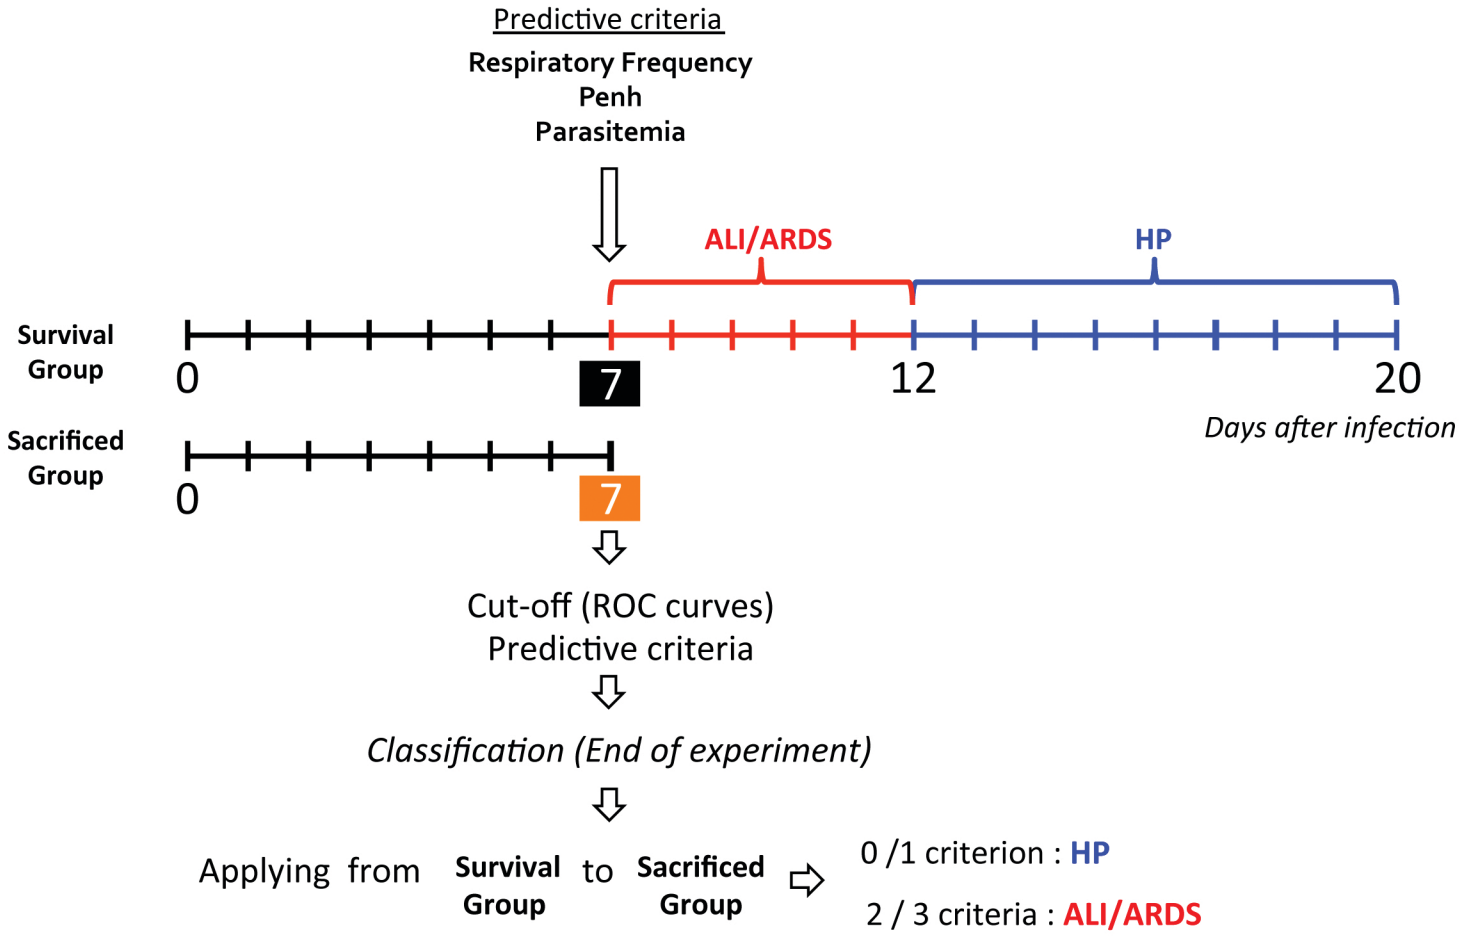

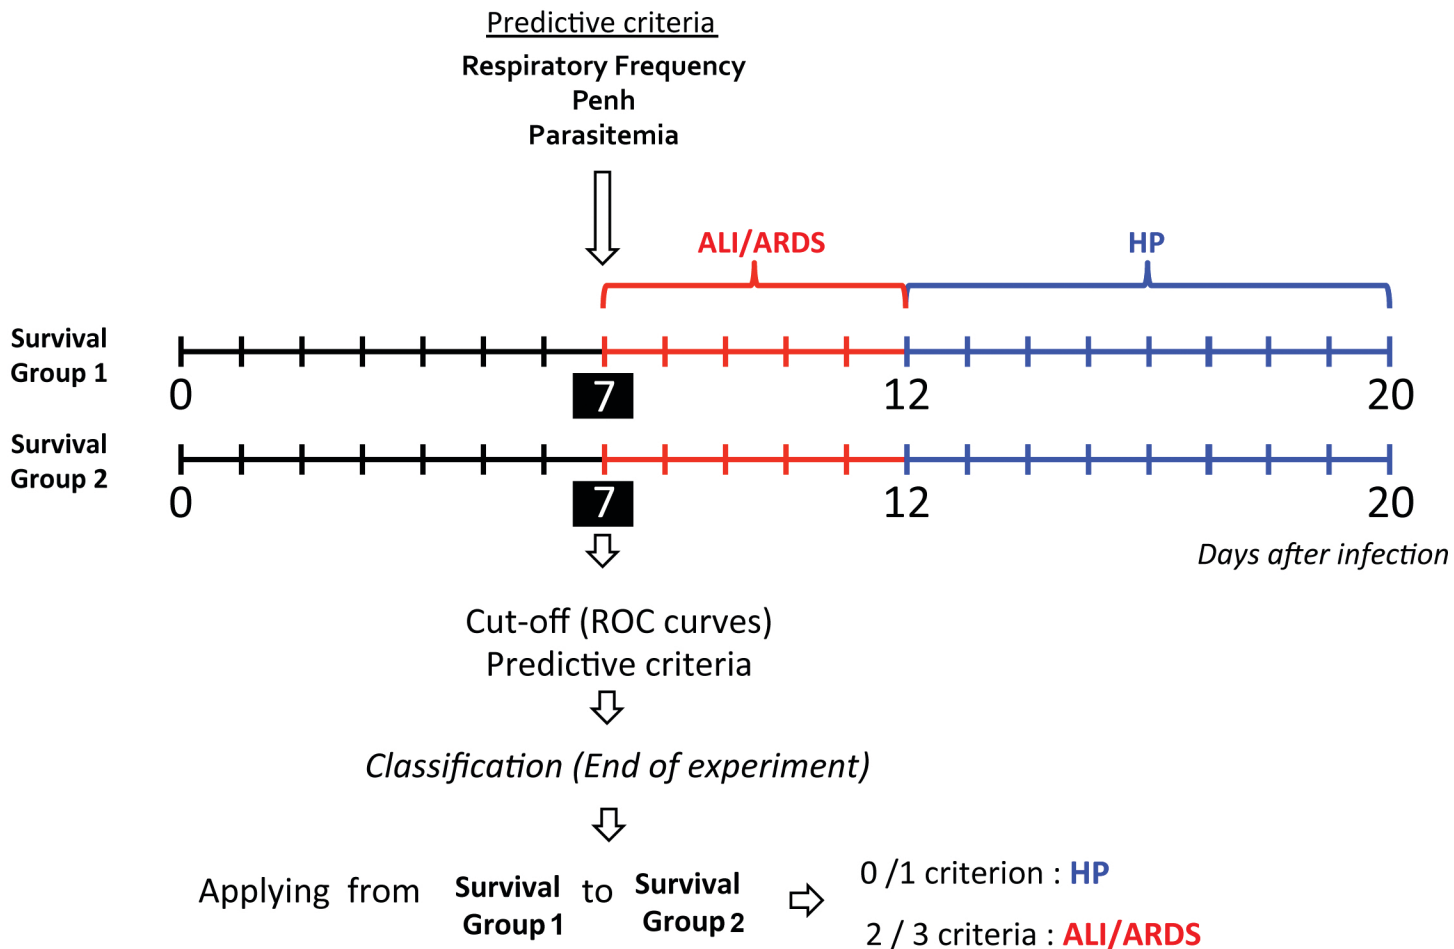

# Supplementary Figure S3

## A

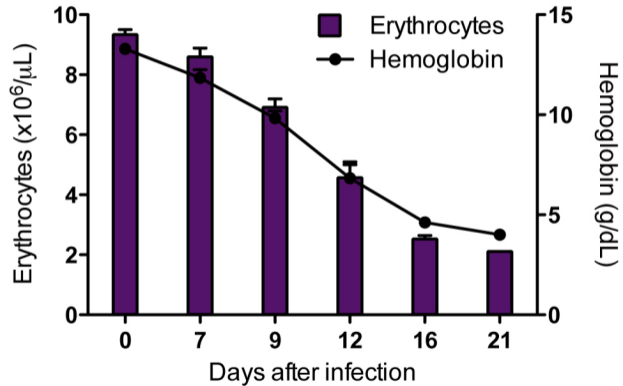

## B

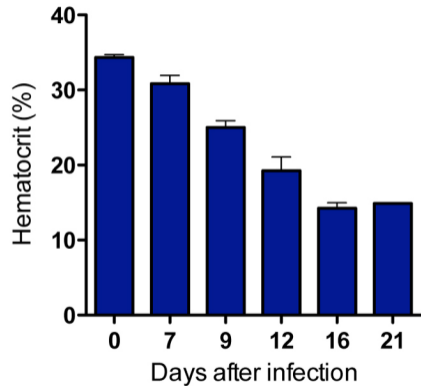

# **A** Supplementary Figure S4

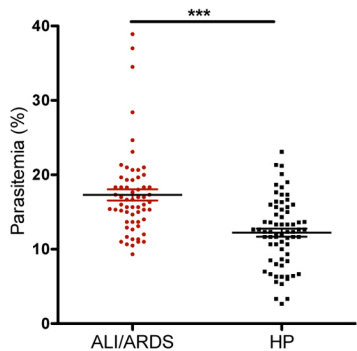

# **B**

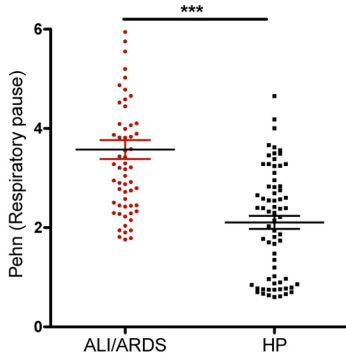

# **C**

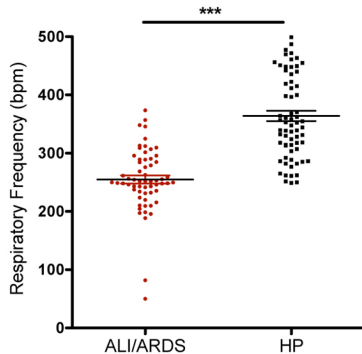

Supplement: 872464.f1.pdf [file 872464.f1.pdf]
